# Supplementary material
Source: publisher figshare collection journal article supplement (https://gsapubs.figshare.com/articles/dataset/_/12538226)
Supplement: Supplementary file 1 [file 1]

## Sheet: analytical techniques
Appendix DR3. Techniques for in situ Sm-Nd isotope analysis of minerals
All in situ isotopic analyses in this study were carried out at the Advanced Analytical Centre, James Cook University, Townsville, Australia, over multiple analytical sessions between June 2015 and May 2017. Mineral analyses of LCG-07, LCG-09 and DM3 were conducted from polished thin sections, whereas mineral analyses from RT7-8b, and RT7-9b were condicted from mineral grain mounts. All analyses …
We used several different secondary mineral standards as quality control materials: MAD, AP1 and Otter Lake apatites from Yang et al. (2014), Mae Klang monazite (Fisher et al., 2011), Diabosatsu allanite ( (Fisher et al., 2011), and MKED1 titanite (Spandler et al., 2016). THese standard were run in triplicate ever 3-4 hours during analytical sessions. Beam diameters were 60 µm for the apatite sta…
References:
Fisher, C.M., McFarlane, C.R.M., Hanchar, J.M., Schmitz, M.D., Sylvester, P.J., Lam, R., Longerich, H.P., 2011. Sm-Nd isotope systematics by laser ablation-multicollector-inductively coupled plasma mass spectrometry: Methods and potential natural and synthetic reference materials. Chemical Geology, v. 284, p. 1-20.
Hammerli, J., Kemp, A.I.S., Spandler, C., 2014. Neodymium isotope equilibration during crustal metamorphism revealed by in situ microanalysis of REE-rich accessory minerals. Earth and Planetary Science Letters, v. 392, p. 133-142.
Spandler, C., Hammerli, J., Sha, P., Hilbert-Wolf, H., Hu, Y., Roberts, E.M., Schmitz, M., 2016. MKED1: A new titanite standard for in situ analysis of Sm-Nd isotopes and U-Pb geochronology. Chemical Geology, v. 425, p. 110-126.
Yang, Y.H., Wu, F.Y., Yang, J.H., Chew, D.M., Xie, L.W., Chu, Z.Y., et al., 2014. Sr and Nd isotopic compositions of apatite reference materials used in U–Th–Pb geochronology. Chemical Geology, v. 385, p. 35-55.

## Sheet: standards
Appendix DR3. Sm-Nd isotope data for secondary standard, with reference values
Otter Lake apatite (Yang et al. 2014, Chemical Geology 385, 35-55): 60 µm spot size											AP1 apatite (Yang et al. 2014, Chemical Geology 385, 35-55): 60 µm spot size											MAD apatite (Yang et al. 2014, Chemical Geology 385, 35-55): 60 µm spot size											MKED1 titanite (Spandler et al. 2016, Chemical Geology 425, 110-126): 90 µm spot size											Mae Klang monazite (Fisher et al. 2011, Chemical Geology 284, 1-20): 24 µm spot size
analysis	measured 147Sm/144Nd	2 s	measured 143Nd/144Nd	2 s	age (m.y.)	initial 143Nd/144Nd	eNd	2 s			analysis	measured 147Sm/144Nd	2 s	measured 143Nd/144Nd	2 s	age (m.y.)	initial 143Nd/144Nd	eNd	2 s			analysis	measured 147Sm/144Nd	2 s	measured 143Nd/144Nd	2 s	age (m.y.)	initial 143Nd/144Nd	eNd	2 s			analysis	measured 147Sm/144Nd	2 s	measured 143Nd/144Nd	2 s	age (m.y.)	initial 143Nd/144Nd	eNd	2 s			analysis	measured 147Sm/144Nd	2 s	measured 143Nd/144Nd	2 s	age (m.y.)
Reference value	0.0827	0.0021	0.511942	4.5e-05	913	0.511447	-0.25	0.88			Reference value	0.0822	0.0014	0.511349	3.8e-05	475	0.511094	-18.2	0.8			Reference value	0.0811	0.0017	0.511322	5.3e-05	485	0.511064	-18.5	1			Reference value - laser	0.129	0.0015	0.511645	3.7e-05	1518	0.510358	-6.3	0.65			Reference value - laser	0.0924	0.0124	0.512635	2.4e-05	27
																																	Reference value -TIMS	0.127	0.0004	0.51163	3e-06	1518	0.510363	-6.13	0.05			Reference value -TIMS	0.0978	0.0227	0.512646	1.3e-05	27
Session 01/06/2016											Session 01/06/2016											Session 16/06/2015											Session 01/06/2016											Session 22/02/2015
Otterlake 1	0.0814	0.0003	0.511889	2.3e-05	913	0.511401	-1.16	0.44			AP-1 1	0.0783	0.0004	0.511383	3.3e-05	475	0.511139	-17.33	0.64			MAD1	0.0849	3e-05	0.511329	4.7e-05	485	0.511059	-18.64	0.93			MKED1	0.1297	0.0002	0.511641	2.1e-05	1518	0.510347	-6.45	0.41			MaeLKlang_3	0.0885	0.0006	0.51263	1.8e-05	27
Otterlake 2	0.0815	0.0003	0.511883	2.5e-05	913	0.511395	-1.28	0.48			AP-1 2	0.081	0.0003	0.51136	4.5e-05	475	0.511108	-17.94	0.87			MAD2	0.085	2e-05	0.511311	4.6e-05	485	0.511041	-18.99	0.9			MKED2	0.1299	0.0001	0.511643	2.7e-05	1518	0.510347	-6.45	0.53			MaeLKlang_4	0.1141	0.0007	0.512633	1.9e-05	27
Otterlake 3	0.0814	0.0003	0.511921	2.2e-05	913	0.511433	-0.54	0.43			AP-1 3	0.081	0.0003	0.511361	4.4e-05	475	0.511109	-17.92	0.86			MAD3	0.0853	3e-05	0.511295	4.1e-05	485	0.511024	-19.32	0.79			MKED3	0.1296	0.0001	0.511621	2.4e-05	1518	0.510328	-6.83	0.48			MaeLKlang_5	0.0916	0.0006	0.512632	1.9e-05	27
Otterlake 4	0.0806	0.0007	0.511918	2.9e-05	913	0.511435	-0.49	0.56			AP1-4	0.0801	0.0002	0.51136	4.1e-05	475	0.511111	-17.87	0.8			MAD4	0.0844	3e-05	0.511306	4.3e-05	485	0.511038	-19.05	0.85			MKED4	0.1298	0.0001	0.511637	2.8e-05	1518	0.510342	-6.56	0.55			MaeLKlang_6	0.0893	0.0011	0.512645	2.4e-05	27
Otterlake 5	0.082	0.0002	0.511908	2.3e-05	913	0.511417	-0.85	0.46			AP1-5	0.081	0.0002	0.511336	4e-05	475	0.511084	-18.41	0.77			MAD5	0.0845	2e-05	0.511305	4.6e-05	485	0.511036	-19.08	0.9			MKED5	0.1298	0.0001	0.511635	2.9e-05	1518	0.510339	-6.6	0.56			MaeLKlang_7	0.0894	0.0005	0.512634	2e-05	27
otterlake 6	0.0826	0.0002	0.511909	2.3e-05	913	0.511415	-0.9	0.45			AP1-6	0.0822	0.0002	0.511314	3.9e-05	475	0.511058	-18.9	0.76			MAD6	0.0847	3e-05	0.511321	4.2e-05	485	0.511051	-18.79	0.81			MKED6	0.1307	0.0001	0.511622	2.7e-05	1518	0.510317	-7.03	0.52			MaeLKlang_8	0.0854	0.0005	0.512633	1.8e-05	27
otterlake 7	0.0809	0.0002	0.511906	2.5e-05	913	0.511421	-0.76	0.5			AP1-7	0.0832	0.0001	0.511331	4e-05	475	0.511072	-18.64	0.78			MAD7	0.0838	4e-05	0.511356	4.8e-05	485	0.51109	-18.04	0.93			MKED7	0.1306	0.0001	0.511637	3e-05	1518	0.510334	-6.7	0.58			MaeLKlang_9	0.0872	0.0007	0.512639	1.7e-05	27
otterlake 8	0.0824	0.0001	0.511885	2.8e-05	913	0.511391	-1.36	0.55			AP1-8	0.0819	0.0002	0.511369	4.3e-05	475	0.511114	-17.82	0.83			MAD8	0.0838	3e-05	0.511294	5e-05	485	0.511027	-19.26	0.97			MKED8	0.1308	0.0002	0.511637	2.7e-05	1518	0.510332	-6.75	0.53			MaeLKlang_10	0.0898	0.0005	0.512633	1.7e-05	27
otterlake 9	0.0822	0.0001	0.511917	3.1e-05	913	0.511424	-0.71	0.61			AP1-9	0.0832	0.0003	0.511299	4.9e-05	475	0.51104	-19.26	0.95			MAD9	0.0839	4e-05	0.511338	4.4e-05	485	0.511072	-18.4	0.86			MKED9	0.1291	0.0001	0.511646	2.7e-05	1518	0.510357	-6.25	0.54			MaeLKlang_11	0.1184	0.0007	0.51265	1.7e-05	27
otterlake 10	0.0819	0.0002	0.511919	2.5e-05	913	0.511428	-0.63	0.49			AP1-10	0.0824	0.0003	0.511352	4.8e-05	475	0.511096	-18.17	0.94			MAD10	0.0838	3e-05	0.511327	4.8e-05	485	0.511061	-18.61	0.94			MKED10	0.1296	0.0002	0.511616	2.8e-05	1518	0.510323	-6.93	0.55			MaeLKlang_12	0.1164	0.0007	0.512643	1.7e-05	27
otterlake11	0.0813	0.0001	0.511893	2.7e-05	913	0.511406	-1.07	0.52			AP1-11	0.0811	0.0002	0.511284	4.5e-05	475	0.511032	-19.43	0.88			MAD11	0.0837	3e-05	0.511329	4.8e-05	485	0.511063	-18.57	0.94			MKED11	0.1296	0.0001	0.511655	3.8e-05	1518	0.510363	-6.15	0.75			MaeLKlang_13	0.1097	0.0012	0.512633	1.6e-05	27
																						MAD12	0.0838	3e-05	0.511304	4.8e-05	485	0.511037	-19.06	0.93														MaeLKlang_15	0.0989	0.0006	0.512644	2.4e-05	27
Average	0.0817	0.0002	0.511904	2.6e-05	913	0.511415	-0.89	0.5			Average	0.0814	0.0002	0.511341	4.2e-05	475	0.511088	-18.34	0.83			MAD13	0.084	3e-05	0.511309	4.7e-05	485	0.511042	-18.97	0.92			Average	0.1299	0.0001	0.511635	2.8e-05	1518	0.510339	-6.61	0.55			MaeLKlang_16	0.0922	0.0006	0.51264	1.8e-05	27
2 s	0.0012	0.0003	2.9e-05	6e-06		3e-05	0.59				2 s	0.0028	0.0002	6.2e-05	9e-06		6.7e-05	1.31				MAD14	0.0841	3e-05	0.511316	4.5e-05	485	0.511048	-18.85	0.87			2 s	0.0011	0.0001	2.3e-05	8e-06		2.8e-05	0.55				MaeLKlang_17	0.0826	0.0005	0.512634	1.7e-05	27
																						MAD15	0.0841	3e-05	0.51134	5.3e-05	485	0.511073	-18.37	1.03														MaeLKlang_18	0.1121	0.0012	0.51266	1.8e-05	27
Session 16/06/2016											Session 16/06/2016											MAD16	0.0836	3e-05	0.51133	3.7e-05	485	0.511064	-18.53	0.73			Session 16/06/2015
																						MAD17	0.0835	3e-05	0.511302	4.8e-05	485	0.511036	-19.08	0.94														Average	0.0977	0.0007	0.512638	1.9e-05	27
Otterlake 1	0.0818	0.0002	0.511918	2.4e-05	913	0.511428	-0.64	0.47			AP-1 1	0.0826	0.0002	0.511325	3.6e-05	475	0.511068	-18.71	0.71			MAD18	0.0831	3e-05	0.511303	4.1e-05	485	0.511039	-19.03	0.81			MKED_2	0.1324	0.0029	0.511638	3.5e-05	1518	0.510317	-7.04	0.69			2 s	0.0253	0.0005	1.7e-05	5e-06
Otterlake 2	0.0813	0.0002	0.511895	2.1e-05	913	0.511409	-1.02	0.42			AP-1 2	0.0833	0.0003	0.511379	3.9e-05	475	0.51112	-17.7	0.77														MKED_3	0.1286	0.0029	0.511668	4.2e-05	1518	0.510385	-5.71	0.83
Otterlake 3	0.0815	0.0002	0.511906	2.4e-05	913	0.511418	-0.83	0.46			AP-1 3	0.0809	0.0003	0.511324	4.2e-05	475	0.511073	-18.62	0.83			Average	0.0841	3e-05	0.511318	4.6e-05	485	0.51105	-18.81	0.89			MKED_4	0.1305	0.0029	0.511663	3.4e-05	1518	0.510361	-6.17	0.67
Otterlake 4	0.0806	0.0003	0.511897	2.7e-05	913	0.511414	-0.91	0.53			AP-1 4	0.0818	0.0005	0.511362	4.7e-05	475	0.511107	-17.95	0.91			2 s	0.0012	1e-05	3.4e-05	8e-06		3.6e-05	0.66				MKED_5	0.1335	0.0029	0.511657	4.1e-05	1518	0.510325	-6.89	0.8
Otterlake 5	0.0804	0.0002	0.511916	2.7e-05	913	0.511434	-0.51	0.53			AP-1 5	0.0799	0.0005	0.511347	4.9e-05	475	0.511098	-18.13	0.95														MKED_6	0.1326	0.0029	0.511675	4.8e-05	1518	0.510352	-6.36	0.93
Otterlake 6	0.0812	0.0002	0.5119	2.1e-05	913	0.511414	-0.92	0.42			AP-1 6	0.079	0.0004	0.51135	3.2e-05	475	0.511104	-18.01	0.62														MKED_8	0.1324	0.0029	0.511661	4.3e-05	1518	0.51034	-6.58	0.84
Otterlake 7	0.0813	0.0002	0.5119	2.2e-05	913	0.511414	-0.92	0.43																									MKED_10	0.1324	0.0029	0.511642	3.4e-05	1518	0.510321	-6.96	0.67
											Average	0.0813	0.0004	0.511348	4.1e-05	475	0.511095	-18.19	0.8														MKED_11b	0.13	0.0029	0.511623	4.8e-05	1518	0.510325	-6.88	0.94
Average	0.0812	0.0002	0.511905	2.4e-05		0.511419	-0.82	0.47			2 s	0.0033	0.0002	4.3e-05	1.3e-05		4.1e-05	0.79															MKED_11c	0.1291	0.0028	0.511606	3.1e-05	1518	0.510318	-7.02	0.6
2 s	0.001	0.0001	1.8e-05	5e-06		1.8e-06	0.36																										MKED_11d	0.1297	0.0028	0.511632	3.5e-05	1518	0.510338	-6.63	0.69
																																	MKED_12a	0.1282	0.0028	0.511625	3.7e-05	1518	0.510346	-6.47	0.72
Session 08/05/2017											Session 08/05/2017																						MKED_12d	0.129	0.0041	0.511653	4.7e-05	1518	0.510366	-6.08	0.93
																																	MKED_12e	0.1301	0.0029	0.511654	3.8e-05	1518	0.510356	-6.27	0.74
Otterlake 1	0.0797	0.0002	0.511897	2.6e-05	913	0.51142	-0.79	0.5			AP1-1	0.0814	0.0002	0.511384	4.1e-05	475	0.511131	-17.49	0.79														MKED_13b	0.1297	0.0028	0.511649	4.5e-05	1518	0.510355	-6.3	0.88
Otterlake 2	0.0784	0.0002	0.511925	2.1e-05	913	0.511455	-0.11	0.4			AP1-2	0.0797	0.0002	0.511311	3e-05	475	0.511062	-18.82	0.59														MKED_13c	0.13	0.0029	0.511635	4.9e-05	1518	0.510338	-6.62	0.96
Otterlake 3	0.0787	0.0002	0.511899	2.5e-05	913	0.511428	-0.64	0.49			AP1-3	0.083	0.0002	0.511304	2.3e-05	475	0.511046	-19.14	0.44														MKED_14a	0.1314	0.0029	0.511666	4.5e-05	1518	0.510355	-6.29	0.89
Otterlake 4	0.0802	0.0002	0.511903	2.6e-05	913	0.511423	-0.74	0.5			AP1-4	0.083	0.0002	0.511324	2.4e-05	475	0.511066	-18.76	0.47														MKED_14b	0.1309	0.0029	0.51165	4.5e-05	1518	0.510344	-6.51	0.88
Otterlake 5	0.0811	0.0002	0.511901	2.6e-05	913	0.511416	-0.88	0.5			AP1-5	0.083	0.0002	0.511323	3.1e-05	475	0.511065	-18.78	0.61														MKED_14c	0.1325	0.0029	0.511658	4.3e-05	1518	0.510336	-6.66	0.84
Otterlake 6	0.08	0.0002	0.511906	2.7e-05	913	0.511426	-0.67	0.53																									MKED_15a	0.1307	0.0029	0.511633	4e-05	1518	0.510329	-6.81	0.77
otterlake 07	0.0813	0.0002	0.51193	3e-05	913	0.511443	-0.35	0.59			Average	0.082	0.0002	0.511329	3e-05	475	0.511074	-18.6	0.58														MKED_15b	0.1296	0.0028	0.511622	3.7e-05	1518	0.510328	-6.82	0.72
otterlake 08	0.0816	0.0002	0.511914	2.3e-05	913	0.511426	-0.68	0.45			2 s	0.0029	0	6.3e-05	1.4e-05		6.6e-05	1.28	0.28														MKED_15c	0.1297	0.0028	0.511617	4.3e-05	1518	0.510323	-6.93	0.85
otterlake 09	0.0812	0.0002	0.511909	2.5e-05	913	0.511423	-0.73	0.49																									MKED_16a	0.1298	0.0028	0.511619	3.8e-05	1518	0.510325	-6.89	0.75
otterlake 10	0.0803	0.0002	0.511909	2.7e-05	913	0.511428	-0.63	0.52																									MKED_16b	0.13	0.0029	0.511685	4.1e-05	1518	0.510387	-5.67	0.81
otterlake 11	0.0803	0.0002	0.511916	2.1e-05	913	0.511435	-0.49	0.42			Session 22/02/2015																						MKED_16c	0.1295	0.0028	0.511614	3.7e-05	1518	0.510322	-6.93	0.72
																																	MKED_17a	0.1281	0.0028	0.511617	4.1e-05	1518	0.51034	-6.59	0.8
Average	0.0803	0.0002	0.51191	2.5e-05	913	0.511429	-0.61	0.49			Ap1_3	0.084	0.0005	0.511342	4.4e-05	475	0.511081	-18.47	0.87														MKED_17b	0.1288	0.0028	0.511621	3.5e-05	1518	0.510336	-6.67	0.69
2 s	0.0021	0	2.1e-05	5e-06		2.2e-05	0.44				Ap1_4	0.0827	0.0005	0.511348	2.8e-05	475	0.511091	-18.27	0.54
											Ap1_5	0.0832	0.0005	0.511331	2.8e-05	475	0.511072	-18.64	0.55														Average	0.1304	0.0029	0.511642	4e-05	1518	0.510341	-6.57	0.79
Session 22/02/2015											Ap1_6	0.0831	0.0005	0.511319	3e-05	475	0.511061	-18.86	0.58														2 s	0.003	0.0005	4.3e-05	1e-06		3.8e-05	0.75
											Ap1_7	0.0836	0.0005	0.511353	3.5e-05	475	0.511093	-18.23	0.68
Otterlake_2	0.0791	0.0005	0.511892	3.2e-05	913	0.511419	-0.81	0.63			Ap1_8	0.0841	0.0005	0.511343	3.7e-05	475	0.511082	-18.45	0.73
Otterlake_3	0.08	0.0005	0.511911	3.5e-05	913	0.511431	-0.57	0.67			Ap1_9	0.0838	0.0005	0.511323	3.2e-05	475	0.511062	-18.83	0.62														Session 22/02/2015
Otterlake_4	0.0798	0.0005	0.511899	2.5e-05	913	0.511421	-0.78	0.5
Otterlake_5	0.0801	0.0005	0.511924	2.5e-05	913	0.511444	-0.32	0.49			Average	0.0835	0.0005	0.511337	3.3e-05	475	0.511077	-18.53	0.65														MKED_1	0.1307	0.0007	0.511666	3.8e-05	1518	0.510362	-6.16	0.75
Otterlake_6	0.081	0.0005	0.511919	3.1e-05	913	0.511434	-0.51	0.61			2 s	0.001	0.0001	2.6e-05	1.2e-05		2.6e-05	0.5															MKED_2	0.1299	0.0007	0.511661	3e-05	1518	0.510365	-6.1	0.59
Otterlake_7	0.08	0.0005	0.511927	2.6e-05	913	0.511447	-0.26	0.51																									MKED_3	0.129	0.0007	0.511628	2.5e-05	1518	0.510341	-6.58	0.49
Otterlake_8	0.0816	0.0005	0.511923	3e-05	913	0.511434	-0.51	0.58																									MKED_4	0.1291	0.0007	0.51164	2.6e-05	1518	0.510352	-6.35	0.51
Otterlake_9	0.0807	0.0005	0.511927	3e-05	913	0.511444	-0.33	0.59			Session 16/06/2015																						MKED_5	0.1317	0.0007	0.511644	2.8e-05	1518	0.51033	-6.79	0.54
Otterlake_10	0.0818	0.0005	0.511933	2.5e-05	913	0.511443	-0.35	0.49																									MKED_7	0.1294	0.0007	0.511632	3.3e-05	1518	0.51034	-6.58	0.65
Otterlake_11	0.0811	0.0005	0.511923	2.6e-05	913	0.511437	-0.46	0.52			Ap1	0.0816	0.0002	0.511369	4.2e-05	475	0.511115	-17.8	0.82														MKED_8	0.1293	0.0007	0.511648	3.1e-05	1518	0.510358	-6.23	0.6
Otterlake_12	0.0811	0.0005	0.511919	3e-05	913	0.511433	-0.53	0.59			Ap2	0.0811	0.0002	0.51134	3.8e-05	475	0.511087	-18.34	0.75														MKED_9	0.1301	0.0007	0.511653	3e-05	1518	0.510355	-6.29	0.58
Otterlake_13	0.0802	0.0005	0.511911	2.5e-05	913	0.511431	-0.58	0.49			Ap3	0.0812	0.0001	0.511312	3.5e-05	475	0.511059	-18.89	0.68
Otterlake_14	0.0807	0.0005	0.511912	2.4e-05	913	0.511429	-0.62	0.48			Ap4	0.0815	0.0001	0.511331	3.4e-05	475	0.511077	-18.53	0.66														Average	0.1299	0.0007	0.511647	3e-05	1518	0.510351	-6.39	0.59
Otterlake_15	0.0812	0.0005	0.511921	2.6e-05	913	0.511435	-0.5	0.51			Ap5	0.0811	0.0003	0.511333	3.6e-05	475	0.511081	-18.47	0.7														2 s	0.0018	0	2.7e-05	8e-06		2.4e-05	0.48	0.08
											Ap6	0.0808	0.0002	0.511301	3.9e-05	475	0.51105	-19.07	0.76
Average	0.0806	0.0005	0.511917	2.8e-05	913	0.511434	-0.51	0.55			Ap7	0.0793	0.0003	0.511378	3.3e-05	475	0.511131	-17.48	0.65
2 s	0.00151911	0	2.3e-05	7e-06		1.7e-05	0.32				Ap8	0.0814	0.0002	0.511333	3.4e-05	475	0.51108	-18.49	0.66														Session 09/05/2017
Session 09/05/2017											Average	0.081	0.0002	0.511337	3.6e-05	475	0.511085	-18.38	0.71														MKED_1	0.1296	0.0002	0.511615	3.2e-05	1518	0.510322	-6.95	0.63
											2 s	0.0015	0.0002	5.2e-05	6e-06		5.4e-05	1.05	0.12														MKED_2	0.1296	0.0003	0.511629	3.2e-05	1518	0.510336	-6.68	0.63
Otterlake_1	0.0804	0.0002	0.511924	2.4e-05	913	0.511442	-0.35	0.47																									MKED_3	0.1295	0.0003	0.511673	3.8e-05	1518	0.510381	-5.78	0.74
Otterlake_2	0.0813	0.0003	0.511902	2e-05	913	0.511415	-0.89	0.39																									MKED_4	0.1294	0.0003	0.511645	3.2e-05	1518	0.510354	-6.31	0.62
Otterlake_3	0.0811	0.0003	0.511917	2.3e-05	913	0.511431	-0.57	0.45																									MKED_5	0.1305	0.0003	0.511621	3.8e-05	1518	0.510319	-7	0.73
Otterlake_4	0.0804	0.0003	0.511908	2e-05	913	0.511426	-0.67	0.39																									MKED_6	0.1302	0.0003	0.511605	3.2e-05	1518	0.510306	-7.25	0.63
Otterlake_5	0.081	0.0003	0.5119	2.5e-05	913	0.511415	-0.89	0.49																									MKED_7	0.1304	0.0004	0.511654	3.9e-05	1518	0.510353	-6.33	0.77
Otterlake_6	0.0804	0.0002	0.511907	2.2e-05	913	0.511426	-0.68	0.44																									MKED_8	0.1291	0.0005	0.51164	3.3e-05	1518	0.510352	-6.35	0.64
Otterlake_7	0.0795	0.0004	0.511903	1.8e-05	913	0.511427	-0.66	0.36																									MKED_9	0.1307	0.0005	0.511664	3.5e-05	1518	0.51036	-6.21	0.7
Otterlake_8	0.0797	0.0004	0.511911	2e-05	913	0.511434	-0.52	0.4																									MKED_10	0.1285	0.0005	0.511649	3.3e-05	1518	0.510368	-6.05	0.65
Otterlake_9	0.0796	0.0004	0.51192	1.9e-05	913	0.511444	-0.33	0.36
																																	Average	0.1298	0.0004	0.51164	3.4e-05	1518	0.510345	-6.49	0.674
Average	0.08038	0.0003	0.51191	2.1e-05	913	0.511429	-0.62	0.42																									2 s	0.0014	0.0002	4.4e-05	6e-06		4.7e-05	0.93
2 s	0.0013	0.0002	1.7e-05	5e-06		2e-05	0.4
Session 16/06/2015
Otterlake1	0.0807	0.0001	0.51191	2.7e-05	913	0.511427	-0.66	0.52
Otterlake2	0.0809	0.0001	0.511919	2.9e-05	913	0.511434	-0.52	0.57
Otterlake2b	0.0791	0.0002	0.511913	2.6e-05	913	0.511439	-0.42	0.5
Otterlake3	0.0807	0.0003	0.511921	2.8e-05	913	0.511437	-0.45	0.55
Otterlake3b	0.0813	0.0001	0.511906	2.3e-05	913	0.511419	-0.81	0.45
Otterlake4	0.0821	0.0001	0.511928	1.8e-05	913	0.511436	-0.48	0.35
Otterlake5	0.0835	0.0002	0.511932	2.9e-05	913	0.511432	-0.56	0.56
Otterlake7	0.0833	0.0002	0.511955	3.4e-05	913	0.511456	-0.08	0.67
Otterlake8	0.0846	0.0008	0.51196	2.3e-05	913	0.511454	-0.14	0.45
Otterlake9	0.0809	0.0006	0.511913	1.8e-05	913	0.511428	-0.64	0.35
Otterlake10	0.0774	0.0007	0.511925	2.5e-05	913	0.511462	0.02	0.5
Average	0.0813	0.0003	0.511926	2.5e-05	913	0.511439	-0.43	0.5
2 s	0.0041	0.0005	3.5e-05	1e-05		2.7e-05	0.52
[truncated: 12 more columns]

## Sheet: RT7-8b
Appendix DR3. Sm-Nd isotope data for apatite and lawsonite from sample RT7-8b.
mineral	sample no.	laser spot diameter	measured 147Sm/144Nd	2 s	measured 145Nd/144Nd	2 s	measured 143Nd/144Nd	2 s	age (m.y.)	initial 143Nd/144Nd	eNd	2 s
apatite	RT78b_ap1	60	0.1456	0.0032	0.348408	2.9e-05	0.512637	4.9e-05	42	0.512597	0.25	0.96
apatite	RT78b_ap2	60	0.1396	0.0031	0.348394	2.4e-05	0.51293	4.1e-05	42	0.512892	6.01	0.79
apatite	RT78b_ap3	60	0.1433	0.0032	0.348396	2.5e-05	0.512706	5.6e-05	42	0.512666	1.6	1.09
apatite	RT78b_ap4	60	0.1565	0.0034	0.348425	2e-05	0.512846	3.9e-05	42	0.512803	4.28	0.76
apatite	RT78b_ap5	44	0.1145	0.004	0.348416	5.6e-05	0.512819	8e-05	42	0.512787	3.96	1.55
apatite	RT78b_ap6*	44	0.134	0.0053	0.348401	2.2e-05	0.511565	5.1e-05	42	0.511528	-20.59	1
apatite	RT78b_ap7	60	0.1604	0.0035	0.3484	6.1e-05	0.512743	0.0001	42	0.512699	2.24	1.95
apatite	RT78b_ap8*	60	0.1482	0.0033	0.348448	3.1e-05	0.512738	6.2e-05	42	0.512698	2.22	1.21
apatite	RT78b_ap9	120	0.1505	0.0008	0.348394	2e-05	0.512703	4.2e-05	42	0.512662	1.52	0.82
apatite	RT78b_ap10	120	0.1879	0.004	0.348439	5.1e-05	0.512856	6.2e-05	42	0.512804	4.29	1.21
apatite	RT78b_ap11	120	0.1656	0.0005	0.348391	2.7e-05	0.512866	4.9e-05	42	0.51282	4.61	0.95
apatite	RT78b_ap12	90	0.1456	0.0002	0.348436	2.1e-05	0.51273	3.8e-05	42	0.51269	2.07	0.74
apatite	RT78b_ap13	90	0.1461	0.0003	0.348399	1.7e-05	0.512685	2.8e-05	42	0.512645	1.2	0.54
apatite	RT78b_ap14	90	0.1624	0.0006	0.34841	3.2e-05	0.512805	6.1e-05	42	0.51276	3.43	1.19
apatite	RT78b_ap15	90	0.2126	0.0005	0.348409	3.7e-05	0.512687	5.9e-05	42	0.512629	0.87	1.16
apatite	RT78b_ap16	90	0.1468	0.0002	0.348424	1.2e-05	0.512691	3.1e-05	42	0.512651	1.31	0.6
apatite	RT78b_ap17	120	0.1468	0.0002	0.348423	1.9e-05	0.512701	4.1e-05	42	0.51266	1.49	0.8
apatite	RT78b_ap18	90	0.1468	0.0007	0.348405	2e-05	0.512692	3.6e-05	42	0.512651	1.32	0.71
apatite	RT78b_ap19	90	0.1453	0.0002	0.348443	2.3e-05	0.512687	3.9e-05	42	0.512647	1.24	0.75
apatite	RT78b_ap20	90	0.1606	0.0003	0.348421	3.7e-05	0.5129	7.1e-05	42	0.512856	5.3	1.39
apatite	RT78b_ap21	90	0.1456	0.0003	0.348436	1.7e-05	0.512696	4.4e-05	42	0.512656	1.4	0.85
apatite	RT78b_ap22	120	0.1822	0.0022	0.348363	6.2e-05	0.512704	0.000102	42	0.512654	1.36	1.99
apatite	RT78b_ap23	90	0.1472	0.0009	0.348389	3.2e-05	0.512646	6.4e-05	42	0.512605	0.42	1.25
apatite	RT78b_ap24	90	0.1556	0.0013	0.348418	5.7e-05	0.512691	8.7e-05	42	0.512648	1.25	1.7
apatite	RT78b_ap25	60	0.1579	0.0009	0.348395	3.5e-05	0.512841	5.9e-05	42	0.512798	4.17	1.14
apatite	RT78b_ap26	60	0.1446	0.0009	0.348434	3.2e-05	0.512776	5.7e-05	42	0.512736	2.96	1.12
apatite	RT78b_ap27	60	0.1571	0.0009	0.348393	2.6e-05	0.512823	5.4e-05	42	0.51278	3.82	1.05
lawsonite	RT78b_laws1	90	0.1906	0.0051	0.348417	5.9e-05	0.512716	9.8e-05	42	0.512663	1.54	1.92
lawsonite	RT78b_laws2	90	0.1593	0.0013	0.348389	3.3e-05	0.512689	6.5e-05	42	0.512645	1.19	1.26
lawsonite	RT78b_laws3	90	0.1916	0.0013	0.348421	3.6e-05	0.512641	4.9e-05	42	0.512588	0.08	0.96
lawsonite	RT78b_laws4	90	0.1891	0.002	0.3484	4e-05	0.512654	5.1e-05	42	0.512602	0.36	1
lawsonite	RT78b_laws5	90	0.1423	0.0012	0.348472	6.6e-05	0.512657	9.2e-05	42	0.512618	0.67	1.79
lawsonite	RT78b_laws6	90	0.1653	0.0011	0.348436	3.4e-05	0.512657	6e-05	42	0.512612	0.54	1.17
lawsonite	RT78b_laws7	90	0.1998	0.0029	0.348444	7e-05	0.512704	6.3e-05	42	0.512649	1.27	1.23
lawsonite	RT78b_laws8	90	0.1848	0.0028	0.348406	5.4e-05	0.512663	6.8e-05	42	0.512612	0.54	1.33
* distinct analysis of core zone of zoned apatite

## Sheet: RT7-9b
Appendix DR3. Sm-Nd isotope data for apatite and lawsonite from sample RT7-9b.
mineral	sample no.	laser spot diameter	measured 147Sm/144Nd	2 s	measured 145Nd/144Nd	2 s	measured 143Nd/144Nd	2 s	age (m.y.)	initial 143Nd/144Nd	eNd	2 s
apatite	RT79b_ap1	60	0.2596	0.0064	0.348388	3.8e-05	0.512197	7.1e-05	42	0.512126	-8.93	1.38
apatite	RT79b_ap2	120	0.3415	0.0011	0.348408	6.3e-05	0.512671	7.3e-05	42	0.512577	-0.14	1.43
apatite	RT79b_ap3	90	0.1699	0.0011	0.348396	2.3e-05	0.512284	4e-05	42	0.512237	-6.77	0.79
apatite	RT79b_ap4	120	0.461	0.0011	0.348403	4.9e-05	0.512663	6.9e-05	42	0.512537	-0.93	1.35
lawsonite	RT79b_lws1	60	0.1267	0.0002	0.348371	7.2e-05	0.512592	5.7e-05	42	0.512557	-0.52	1.11
lawsonite	RT79b_lws2	60	0.1289	0.0003	0.348422	3.6e-05	0.512639	5.1e-05	42	0.512604	0.39	1
lawsonite	RT79b_lws3	90	0.1292	0.0028	0.348423	2.8e-05	0.512715	5.9e-05	42	0.512679	1.86	1.14
lawsonite	RT79b_lws4	60	0.1245	0.0027	0.348395	3.6e-05	0.512641	8.3e-05	42	0.512607	0.45	1.61
lawsonite	RT79b_lws5	60	0.1296	0.0029	0.348396	5.4e-05	0.512661	5.6e-05	42	0.512625	0.8	1.09
lawsonite	RT79b_lws6	60	0.1321	0.0029	0.348387	3.7e-05	0.512634	7.1e-05	42	0.512598	0.27	1.38
lawsonite	RT79b_lws7	60	0.1265	0.0028	0.34843	4.7e-05	0.51258	4.3e-05	42	0.512546	-0.75	0.83
lawsonite	RT79b_lws8	90	0.1265	0.0028	0.348434	4.5e-05	0.512689	5.6e-05	42	0.512654	1.37	1.09
lawsonite	RT79b_lws9	90	0.1294	0.0029	0.348437	9.4e-05	0.512629	4.2e-05	42	0.512593	0.18	0.83

## Sheet: LCG-07
Appendix DR3. Sm-Nd isotope data for apatite and epidote from sample LCG-07
mineral	sample no.	laser spot diameter	measured 147Sm/144Nd	2 s	measured 145Nd/144Nd	2 s	measured 143Nd/144Nd	2 s	age (m.y.)	initial 143Nd/144Nd	eNd	2 s
apatite	LGC07ap1	160	0.2345	0.0014	0.348468	5.1e-05	0.512433	7.7e-05	42	0.512369	-4.2	1.51
apatite	LGC07ap2	160	0.2207	0.0018	0.348434	4.8e-05	0.51234	5.9e-05	42	0.512279	-5.94	1.15
apatite	LGC07ap3	160	0.2294	0.0014	0.34821	5.9e-05	0.512207	0.000103	42	0.512143	-8.59	2
apatite	LGC07ap4	60	0.2286	0.0005	0.358436	6.6e-05	0.512382	8.6e-05	42	0.51232	-5.16	1.67
apatite	LGC07ap5	160	0.2371	0.0007	0.34842	4.7e-05	0.512415	6.2e-05	42	0.51235	-4.57	1.21
apatite	LGC07ap6	160	0.2509	0.0013	0.348375	7.6e-05	0.51237	0.000115	42	0.512301	-5.52	2.24
apatite	LGC07ap7	160	0.2336	0.0008	0.34844	4.5e-05	0.512148	6.5e-05	42	0.512084	-9.76	1.28
apatite	LGC07ap8	160	0.235	0.0012	0.348416	4.8e-05	0.512429	7.2e-05	42	0.512365	-4.28	1.4
apatite	LGC07ap9	160	0.2189	0.0007	0.348393	5.4e-05	0.512242	7.2e-05	42	0.512181	-7.85	1.41
apatite	LGC07ap10	160	0.2357	0.0017	0.348403	5e-05	0.512359	7.9e-05	42	0.512294	-5.66	1.53
apatite	LGC07ap11	160	0.2337	0.0004	0.348416	4.1e-05	0.512378	7.4e-05	42	0.512314	-5.27	1.43
apatite	LGC07ap12	160	0.2276	0.0003	0.348399	6.8e-05	0.512231	0.000112	42	0.512168	-8.11	2.19
apatite	LGC07ap13	160	0.2525	0.0003	0.348487	7.9e-05	0.512519	0.000101	42	0.51245	-2.62	1.97
apatite	LGC07ap14	160	0.257	0.0005	0.348433	4.5e-05	0.512385	7e-05	42	0.512314	-5.26	1.36
apatite	LGC07ap15	160	0.2499	0.0005	0.348341	9.4e-05	0.512145	0.000118	42	0.512077	-9.89	2.3
apatite	LGC07ap16	160	0.2354	0.0003	0.348382	7.1e-05	0.512563	6.5e-05	42	0.512498	-1.67	1.26
apatite	LGC07ap17	160	0.2424	0.0002	0.348445	4.6e-05	0.512628	6e-05	42	0.512561	-0.45	1.16
epidote	LGC07ep1	60	0.0941	0.001	0.348404	1.7e-05	0.512661	3.2e-05	42	0.512635	0.99	0.62
epidote	LGC07ep2	60	0.0924	0.0008	0.348409	2.4e-05	0.512499	4.4e-05	42	0.512473	-2.16	0.85
epidote	LGC07ep3	60	0.0921	0.0006	0.348409	1.1e-05	0.512188	4.3e-05	42	0.512162	-8.23	0.84
epidote	LGC07ep4	60	0.093	0.0004	0.348421	1.1e-05	0.512528	2.7e-05	42	0.512502	-1.59	0.52
epidote	LGC07ep5	60	0.091	0.0004	0.348412	2.3e-05	0.5126	4.5e-05	42	0.512575	-0.18	0.88
epidote	LGC07ep6	120	0.1188	0.0004	0.34843	3.5e-05	0.512203	5.3e-05	42	0.51217	-8.08	1.04
epidote	LGC07ep7	120	0.1483	0.0028	0.348398	6e-05	0.512175	9.5e-05	42	0.512134	-8.77	1.85
epidote	LGC07ep8	120	0.1379	0.0009	0.348439	4.1e-05	0.512202	5.5e-05	42	0.512164	-8.19	1.07
epidote	LGC07ep9	120	0.131	0.0004	0.348402	2.8e-05	0.512298	5.2e-05	42	0.512262	-6.27	1.01
epidote	LGC07ep10	120	0.1338	0.0003	0.348442	3.4e-05	0.512327	5.6e-05	42	0.51229	-5.73	1.09

## Sheet: LCG-09
Appendix DR3. Sm-Nd isotope data for apatite and epidote from sample LCG-09
mineral	sample no.	laser spot diameter	measured 147Sm/144Nd	2 s	measured 145Nd/144Nd	2 s	measured 143Nd/144Nd	2 s	age (m.y.)	initial 143Nd/144Nd	eNd	2 s
apatite	LGC09_ap1	160	0.2213	0.0012	0.348445	3.2e-05	0.512126	5.9e-05	42	0.512065	-10.13	1.15
apatite	LGC09_ap2	160	0.2274	0.0024	0.348429	3.6e-05	0.51216	7.3e-05	42	0.512097	-9.5	1.43
apatite	LGC09_ap3	160	0.2074	0.0013	0.348407	4e-05	0.512144	6.3e-05	42	0.512087	-9.7	1.23
apatite	LGC09_ap4	160	0.2293	0.0014	0.348449	6.3e-05	0.512158	9e-05	42	0.512095	-9.55	1.75
apatite	LGC09_ap5	160	0.2108	0.0012	0.348436	3.8e-05	0.512135	7.2e-05	42	0.512077	-9.89	1.41
apatite	LGC09_ap6	160	0.2188	0.0013	0.348448	4e-05	0.512205	7.4e-05	42	0.512145	-8.56	1.45
apatite	LGC09_ap7	160	0.2336	0.0013	0.348398	2.7e-05	0.51214	5e-05	42	0.512075	-9.92	0.98
apatite	LGC09_ap8	160	0.2171	0.0012	0.3484	2.2e-05	0.512149	4.2e-05	42	0.512089	-9.65	0.81
apatite	LGC09_ap9	160	0.2104	0.0012	0.348484	3.2e-05	0.512201	5.9e-05	42	0.512143	-8.6	1.15
apatite	LGC09_ap10	160	0.2126	0.0012	0.348422	2.1e-05	0.512157	4.9e-05	42	0.512098	-9.48	0.96
apatite	LGC09_ap11	120	0.2098	0.0012	0.348409	4.1e-05	0.512183	5.2e-05	42	0.512126	-8.94	1.02
apatite	LGC09_ap12	120	0.2252	0.0013	0.34839	5.4e-05	0.512207	9.6e-05	42	0.512145	-8.56	1.87
apatite	LGC09_ap13	120	0.1834	0.001	0.348378	2.9e-05	0.512133	4.9e-05	42	0.512082	-9.79	0.96
epidote	LGC09_ep1	60	0.0809	0.0002	0.348425	6.8e-05	0.512135	2e-05	42	0.512111	-9.2	0.39
epidote	LGC09_ep2	60	0.1069	0.2121	0.348364	7e-06	0.512178	1.9e-05	42	0.512146	-8.5	0.38
epidote	LGC09_ep3	60	0.1033	0.0016	0.348427	8e-06	0.512183	2.3e-05	42	0.512152	-8.39	0.45
epidote	LGC09_ep4	60	0.0974	0.0002	0.34842	9e-06	0.51214	1.7e-05	42	0.512112	-9.18	0.33
epidote	LGC09_ep5	60	0.1095	0.0024	0.348421	1.2e-05	0.512189	2.6e-05	42	0.512157	-8.29	0.51
epidote	LGC09_ep6	60	0.1056	0.0004	0.348406	1.7e-05	0.512172	2.8e-05	42	0.512141	-8.61	0.54
epidote	LGC09_ep7	44	0.0912	0.0004	0.348417	1.4e-05	0.512162	2.9e-05	42	0.512135	-8.68	0.56
epidote	LGC09_ep8	90	0.1275	0.0008	0.348442	1.3e-05	0.512195	2.8e-05	42	0.512158	-8.26	0.54
epidote	LGC09_ep9	60	0.1216	0.0008	0.348418	2e-05	0.512192	3.3e-05	42	0.512157	-8.29	0.64
epidote	LGC09_ep10	60	0.1163	0.0003	0.34842	1e-05	0.51216	1.9e-05	42	0.512126	-8.89	0.38
epidote	LGC09_ep11	120	0.1464	0.0004	0.348491	1.8e-05	0.512218	3.1e-05	42	0.512175	-7.92	0.61
epidote	LGC09_ep12	90	0.1192	0.0003	0.348477	2e-05	0.512177	3.8e-05	42	0.512142	-8.58	0.74
epidote	LGC09_ep13	44	0.1068	0.0013	0.348481	3.2e-05	0.512263	4.9e-05	42	0.512232	-6.83	0.96
epidote	LGC09_ep14	120	0.1142	0.0005	0.348434	1.8e-05	0.512112	3.4e-05	42	0.512078	-9.82	0.66
epidote	LGC09_ep15	120	0.1233	0.0003	0.348434	1.9e-05	0.512161	3.5e-05	42	0.512125	-8.91	0.68

## Sheet: DM3
Appendix DR3. Sm-Nd isotope data for monazite from sample DM3.
grain cluster	sample no.	laser spot diameter	measured 147Sm/144Nd	2 s	measured 145Nd/144Nd	2 s	measured 143Nd/144Nd	2 s	age (m.y.)	initial 143Nd/144Nd	eNd	2 s
1	DM3 mz1a	16	0.0885	0.0012	0.348407	3.8e-05	0.511982	2.6e-05	35	0.511962	-12.32	0.5
1	DM3 mz1b	16	0.0803	0.0006	0.348407	1.1e-05	0.511976	2.8e-05	35	0.511958	-12.39	0.55
1	DM3 mz1c	16	0.1231	0.0048	0.348418	8e-06	0.512003	3.1e-05	35	0.511975	-12.06	0.61
1	DM3 mz1d	16	0.1141	0.0036	0.34842	9e-06	0.511977	2.6e-05	35	0.511951	-12.53	0.51
2	DM3 mz2	16	0.0892	0.0004	0.348405	1.7e-05	0.511984	3.4e-05	35	0.511963	-12.28	0.65
3	DM3 mz3a	16	0.0789	0.0004	0.348415	8e-06	0.51196	2e-05	35	0.511942	-12.71	0.38
3	DM3 mz3b	24	0.0748	0.0005	0.348408	8e-06	0.511975	2e-05	35	0.511958	-12.39	0.38
3	DM3 mz3c	24	0.0805	0.0001	0.34841	1e-05	0.51198	2.3e-05	35	0.511962	-12.32	0.45
4	DM3 mz4a	16	0.0667	0.0002	0.348419	9e-06	0.512015	2.2e-05	35	0.512	-11.57	0.42
4	DM3 mz4b	16	0.0719	0.0004	0.348407	9e-06	0.512033	2.3e-05	35	0.512016	-11.25	0.45
4	DM3 mz4c	16	0.0709	0.0004	0.348413	8e-06	0.512026	2.6e-05	35	0.51201	-11.38	0.5
4	DM3 mz4d	44	0.0693	0.0002	0.348409	2.6e-05	0.512019	1.6e-05	35	0.512003	-11.51	0.32
4	DM3 mz4e	24	0.0688	0.0003	0.348408	7e-06	0.512038	2e-05	35	0.512022	-11.14	0.4
5	DM3 mz5a	16	0.1716	0.0039	0.348406	9e-06	0.511961	2.8e-05	35	0.511922	-13.09	0.55
5	DM3 mz5b	16	0.1147	0.0012	0.348407	8e-06	0.511951	3.8e-05	35	0.511924	-13.05	0.75
5	DM3 mz5c	44	0.104	0.0002	0.348415	7e-06	0.511949	1.4e-05	35	0.511925	-13.02	0.27
5	DM3 mz5d	24	0.1346	0.0064	0.348413	5e-06	0.511971	1.8e-05	35	0.51194	-12.74	0.35
6	DM3 mz6a	24	0.13	0.0035	0.348411	8e-06	0.511961	1.9e-05	35	0.511932	-12.9	0.37
6	DM3 mz6b	24	0.0794	0.0008	0.348408	1.2e-05	0.511964	3.6e-05	35	0.511946	-12.62	0.7
6	DM3 mz6c	16	0.0881	0.0002	0.348405	8e-06	0.511975	1.8e-05	35	0.511955	-12.45	0.35
6	DM3 mz6d	24	0.0853	0.0007	0.348401	6e-06	0.511939	1.7e-05	35	0.51192	-13.13	0.33
6	DM3 mz6e	24	0.0939	0.0005	0.348414	7e-06	0.511934	1.8e-05	35	0.511913	-13.27	0.36
7	DM3 mz7a	24	0.1353	0.0013	0.348407	8e-06	0.511961	1.3e-05	35	0.51193	-12.94	0.25
7	DM3 mz7b	24	0.1384	0.0018	0.348404	8e-06	0.511952	1.6e-05	35	0.511921	-13.12	0.32
7	DM3 mz7c	24	0.1266	0.0022	0.348406	7e-06	0.511959	1.7e-05	35	0.51193	-12.93	0.34
7	DM3 mz7d	24	0.1014	0.0019	0.348411	8e-06	0.511963	2.1e-05	35	0.51194	-12.73	0.41
7	DM3 mz7e	24	0.1188	0.0018	0.348406	7e-06	0.511954	2.1e-05	35	0.511927	-13	0.41
7	DM3 mz7f	24	0.1519	0.0018	0.348412	7e-06	0.511949	2e-05	35	0.511914	-13.25	0.39
8	DM3 mz8a	24	0.1187	0.0031	0.348413	6e-06	0.511976	1.7e-05	35	0.511949	-12.56	0.32
8	DM3 mz8b	24	0.0834	0.0008	0.348407	8e-06	0.511972	3.1e-05	35	0.511953	-12.49	0.6
8	DM3 mz8c	24	0.0835	0.0004	0.348408	7e-06	0.511984	3.6e-05	35	0.511965	-12.25	0.7
8	DM3 mz8d	24	0.0848	0.0005	0.348409	6e-06	0.511969	2.1e-05	35	0.51195	-12.55	0.4
8	DM3 mz8e	24	0.1347	0.0025	0.348415	9e-06	0.512005	1.7e-05	35	0.511974	-12.08	0.32
9	DM3 mz9	24	0.1218	0.0012	0.348413	9e-06	0.511987	2.3e-05	35	0.511959	-12.36	0.45
10	DM3 mz10a	24	0.1092	0.0005	0.348408	9e-06	0.512046	2.6e-05	35	0.512021	-11.16	0.51
10	DM3 mz10b	24	0.1	0.0007	0.348421	9e-06	0.512028	3.1e-05	35	0.512006	-11.46	0.6
10	DM3 mz10c	24	0.1084	0.0004	0.348409	7e-06	0.512026	2.2e-05	35	0.512001	-11.55	0.42
